# Supplementary material for: A long-lived cuprous bis-phenanthroline complex for the photodynamic therapy of cancer
Source: Royal Society of Chemistry journal article supplement (doi:10.1039/c8dt00140e), 2018-01-01
Supplement: c8dt00140e1.pdf [file c8dt00140e1.pdf]

## Supporting Information for

### Long-lived cuprous bis-phenanthroline complex for the photodynamic therapy of cancer

Cynthia Al Hageh,<sup>a</sup> Majd Al Assaad,<sup>a</sup> Zeinab El Masri,<sup>a</sup> Nawar Samaan,<sup>a</sup> Mirvat El-Sibai,<sup>a</sup> Christian Khalil,<sup>a</sup> and Rony S. Khnayzer<sup>a,\*</sup>

<sup>a</sup> Department of Natural Sciences, Lebanese American University, Chouran, Beirut 1102-2801, Lebanon.

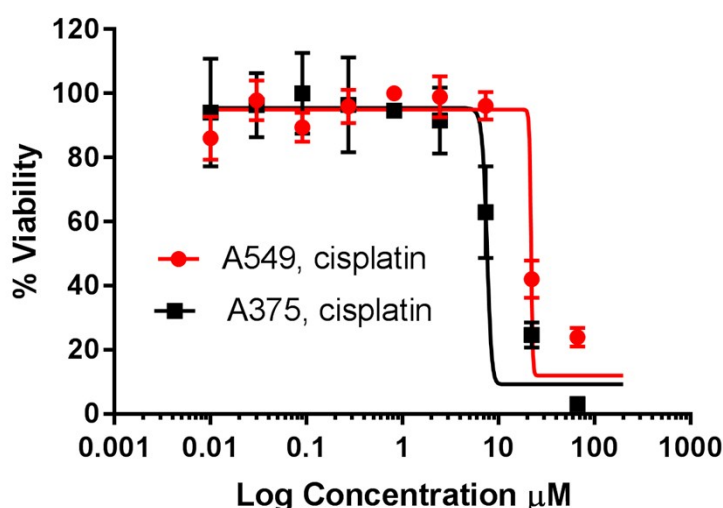

**Figure S1.** Representative cytotoxicity measurement of cisplatin on A375 and A549 cancer cell lines plotted as percent viability versus log of the compound concentration in  $\mu\text{M}$  in the dark. Cells were incubated with the compound for 48 h prior to cytotoxicity assessment.  $\text{IC}_{50}$  values were obtained using GraphPad Prism software by fitting data into a sigmoidal dose response function.

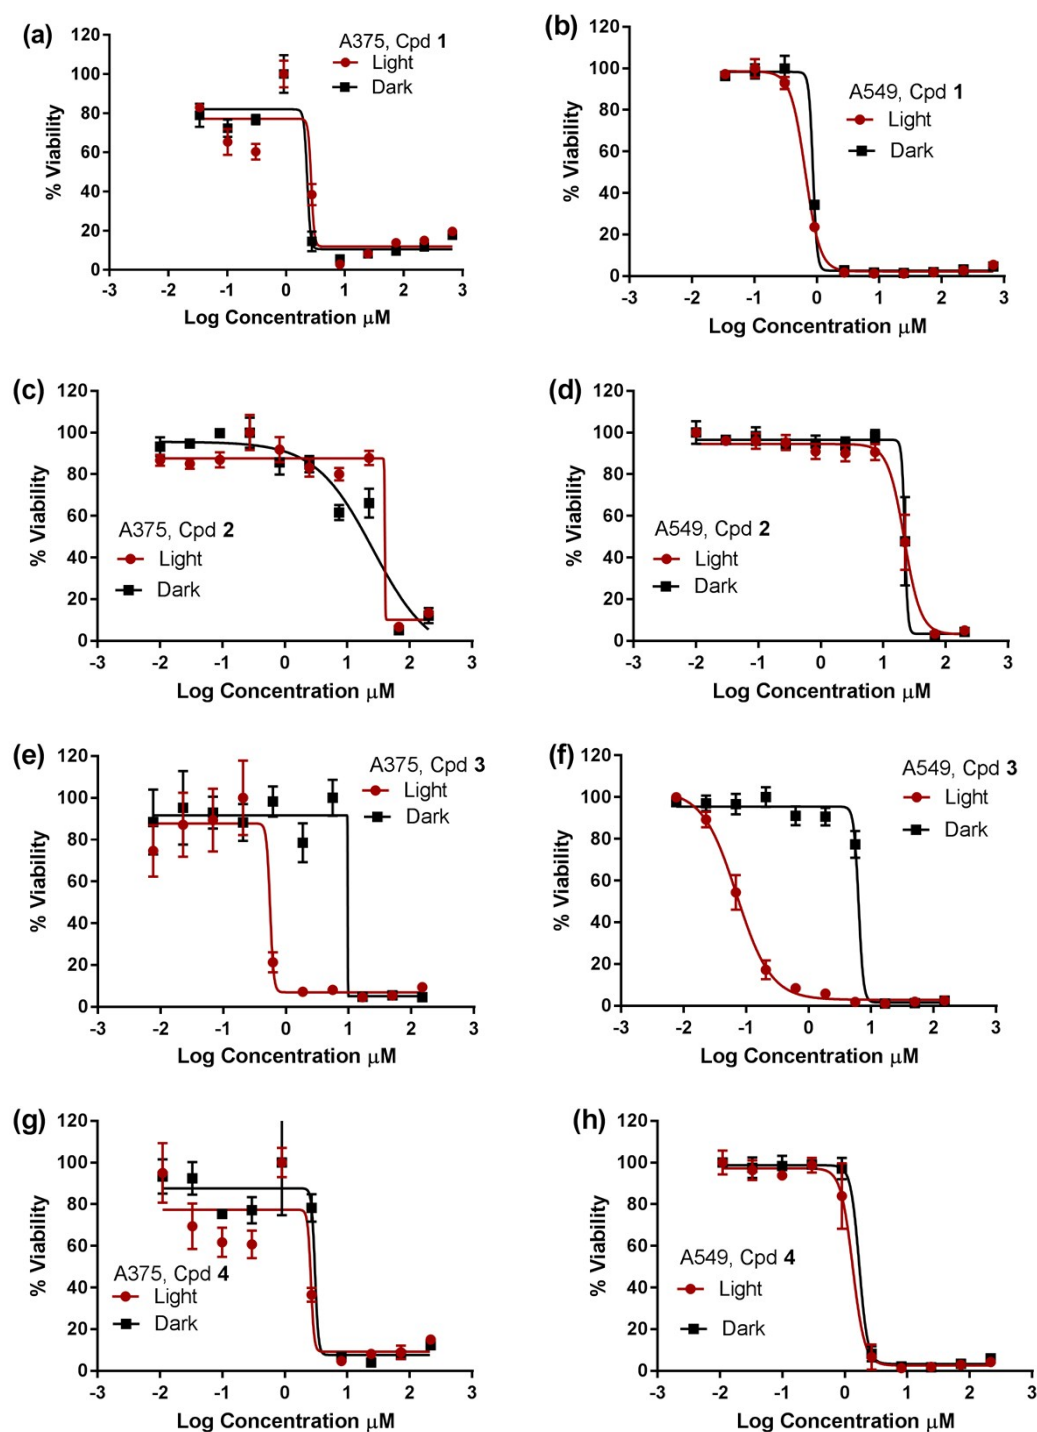

**Figure S2.** Representative cytotoxicity measurement of compounds 1-4 on A375 (human malignant melanoma) (left panel) and A549 (human lung carcinoma) (right panel) cancer cell lines plotted as percent viability versus log of the compound concentration in  $\mu\text{M}$  in the dark (control, black squares) and upon light activated (red circles). Cells were incubated with the compound for 24 h prior to cytotoxicity assessment. Light activation occurred 6 h post incubation and lasted for 30 min using blue-LED.  $\text{IC}_{50}$  values were obtained using GraphPad Prism software by fitting data into a sigmoidal dose response function.
